# Supplementary material for: NIR light-driven deflagration of energetic copper complexes through photothermal effect
Source: Royal Society of Chemistry journal article supplement (doi:10.1039/d2ce01166b), 2022-01-01
Supplement: d2ce01166b1.pdf [file d2ce01166b1.pdf]

## Electronic Supporting Information (ESI)

### NIR light-driven deflagration of energetic copper complexes through photothermal effect

Bin Tan,<sup>a</sup> Chao Chen,<sup>b</sup> Yun-Rui Chen,<sup>a</sup> Jie Zhang\*<sup>a</sup> and Guo-Yu Yang<sup>a</sup>

<sup>a</sup>MOE Key Laboratory of Cluster Science, Beijing Key Laboratory of Photoelectronic/Electrophotonic Conversion Materials, School of Chemistry and Chemical Engineering, Beijing Institute of Technology, Beijing 102488, P. R. China

E-mail: zhangjie68@bit.edu.cn

<sup>b</sup>Fujian Institute of Research on the Structure of Matter, the Chinese Academy of Sciences, Fuzhou, Fujian 350002, P. R. China

**Table S1** The crystal data and structure refinements for **1-3**.

|                                                                                            | <b>1</b>                                                                                       | <b>2</b>                                                                                       | <b>3</b>                                                                     |
|--------------------------------------------------------------------------------------------|------------------------------------------------------------------------------------------------|------------------------------------------------------------------------------------------------|------------------------------------------------------------------------------|
| Empirical formula                                                                          | C <sub>28</sub> H <sub>16</sub> Cl <sub>4</sub> Cu <sub>2</sub> N <sub>8</sub> O <sub>28</sub> | C <sub>21</sub> H <sub>13</sub> Cl <sub>3</sub> Cu <sub>2</sub> N <sub>6</sub> O <sub>22</sub> | C <sub>7</sub> H <sub>8</sub> Cu <sub>2</sub> N <sub>2</sub> O <sub>11</sub> |
| Formula weight                                                                             | 1181.37                                                                                        | 934.80                                                                                         | 423.23                                                                       |
| Crystal system                                                                             | Monoclinic                                                                                     | Triclinic                                                                                      | Triclinic                                                                    |
| Space group                                                                                | <i>P</i> 2 <sub>1</sub> / <i>c</i>                                                             | <i>P</i> -1                                                                                    | <i>P</i> -1                                                                  |
| <i>a</i> /Å                                                                                | 8.1283(7)                                                                                      | 8.1404(3)                                                                                      | 6.9081(4)                                                                    |
| <i>b</i> /Å                                                                                | 23.4063(19)                                                                                    | 14.6857(8)                                                                                     | 8.0731(5)                                                                    |
| <i>c</i> /Å                                                                                | 11.9716(10)                                                                                    | 14.8527(7)                                                                                     | 11.5005(8)                                                                   |
| <i>α</i> /°                                                                                | 90                                                                                             | 111.203(5)                                                                                     | 105.515(6)                                                                   |
| <i>β</i> /°                                                                                | 108.067(9)                                                                                     | 104.809(4)                                                                                     | 92.979(5)                                                                    |
| <i>γ</i> /°                                                                                | 90                                                                                             | 99.771(4)                                                                                      | 97.637(5)                                                                    |
| <i>V</i> /Å <sup>3</sup>                                                                   | 2165.3(3)                                                                                      | 1531.23(14)                                                                                    | 609.95(7)                                                                    |
| <i>Z</i>                                                                                   | 2                                                                                              | 2                                                                                              | 2                                                                            |
| <i>D</i> <sub>c</sub> /g·cm <sup>3</sup>                                                   | 1.812                                                                                          | 2.027                                                                                          | 2.304                                                                        |
| <i>μ</i> /mm <sup>-1</sup>                                                                 | 1.337                                                                                          | 1.760                                                                                          | 5.005                                                                        |
| <i>F</i> (000)                                                                             | 1180                                                                                           | 932                                                                                            | 420                                                                          |
| No. of reflections measured                                                                | 20739                                                                                          | 15526                                                                                          | 4908                                                                         |
| No. of independent reflections                                                             | 5348                                                                                           | 6251                                                                                           | 2517                                                                         |
| No. of parameters                                                                          | 316                                                                                            | 508                                                                                            | 218                                                                          |
| <i>GOOF</i>                                                                                | 1.043                                                                                          | 1.027                                                                                          | 1.032                                                                        |
| <i>R</i> <sub>int</sub>                                                                    | 0.0300                                                                                         | 0.0271                                                                                         | 0.0282                                                                       |
| <i>R</i> <sub>1</sub> , <i>wR</i> <sub>2</sub> [ <i>I</i> >2σ( <i>I</i> )] <sup>a, b</sup> | 0.0565, 0.1459                                                                                 | 0.0305, 0.0726                                                                                 | 0.0327, 0.0860                                                               |
| <i>R</i> <sub>1</sub> , <i>wR</i> <sub>2</sub> (all data)                                  | 0.0760, 0.1610                                                                                 | 0.0394, 0.0774                                                                                 | 0.0388, 0.0912                                                               |
| Largest diff. peak and hole /e Å <sup>-3</sup>                                             | 1.108, -0.782                                                                                  | 0.386, -0.457                                                                                  | 0.453, -0.730                                                                |

$${}^a R_1 = \sum \|F_o\| - \|F_c\| / \sum \|F_o\|, {}^b wR_2 = [\sum w(F_o^2 - F_c^2)^2 / \sum w(F_o^2)^2]^{1/2}$$

**Table S2** Bond lengths [Å] and angles [deg] for **1**.

|                     |            |                    |           |
|---------------------|------------|--------------------|-----------|
| Cu(1)-O(1)          | 1.959(2)   | Cu(1)-O(2)#1       | 1.969(2)  |
| Cu(1)-O(8)#1        | 1.962(3)   | Cu(1)-O(1W)        | 2.138(4)  |
| Cu(1)-O(7)          | 1.963(3)   | Cu(1)-Cu(1)#1      | 2.6544(9) |
| O(1)-Cu(1)-O(8) #1  | 90.28(12)  | O(7)-Cu(1)-O(2)#1  | 88.84(12) |
| O(1)-Cu(1)-O(7)     | 89.60(13)  | O(1)-Cu(1)-O(1W)   | 97.79(14) |
| O(8)#1-Cu(1)-O(7)   | 167.87(13) | O(8)#1-Cu(1)-O(1W) | 99.40(16) |
| O(1)-Cu(1)-O(2)#1   | 168.02(11) | O(7)-Cu(1)-O(1W)   | 92.63(16) |
| O(8)#1-Cu(1)-O(2)#1 | 88.77(12)  | O(2)#1-Cu(1)-O(1W) | 94.15(14) |

Symmetry transformations used to generate equivalent atoms: #1 -x+1,-y+1,-z+1

**Table S3** Bond lengths [Å] and angles [deg] for **2**.

|                    |            |                    |            |
|--------------------|------------|--------------------|------------|
| Cu(1)-O(1)         | 1.9425(14) | Cu(2)-O(3)         | 1.9353(17) |
| Cu(1)-O(9)#1       | 1.9490(16) | Cu(2)-O(8)         | 1.9417(16) |
| Cu(1)-O(2)         | 1.9660(17) | Cu(2)-O(1)         | 1.9674(15) |
| Cu(1)-O(1W)        | 1.9852(16) | Cu(2)-O(1)#1       | 1.9691(16) |
| Cu(1)-O(2W)        | 2.336(2)   | Cu(2)-O(14)        | 2.3909(17) |
| O(1)-Cu(1)-O(9)#1  | 95.33(7)   | O(3)-Cu(2)-O(8)    | 86.09(7)   |
| O(1)-Cu(1)-O(2)    | 95.35(6)   | O(3)-Cu(2)-O(1)    | 93.89(7)   |
| O(9)#1-Cu(1)-O(2)  | 169.31(6)  | O(8)-Cu(2)-O(1)    | 164.64(8)  |
| O(1)-Cu(1)-O(1W)   | 170.76(7)  | O(3)-Cu(2)-O(1)#1  | 175.89(8)  |
| O(9)#1-Cu(1)-O(1W) | 84.84(7)   | O(8)-Cu(2)-O(1)#1  | 95.28(7)   |
| O(2)-Cu(1)-O(1W)   | 84.70(7)   | O(1)-Cu(2)-O(1)#1  | 83.76(7)   |
| O(1)-Cu(1)-O(2W)   | 93.00(7)   | O(3)-Cu(2)-O(14)   | 96.00(7)   |
| O(9)#1-Cu(1)-O(2W) | 91.53(9)   | O(8)-Cu(2)-O(14)   | 100.50(7)  |
| O(2)-Cu(1)-O(2W)   | 87.43(9)   | O(1)-Cu(2)-O(14)   | 94.78(6)   |
| O(1W)-Cu(1)-O(2W)  | 96.23(8)   | O(1)#1-Cu(2)-O(14) | 87.57(6)   |

Symmetry transformations used to generate equivalent atoms: #1 -x+1,-y+2,-z+1

**Table S4** The hydrogen bonding data for **2**.

| D-H...A                    | d(D-H)/Å  | d(H...A)/Å | d(D...A)/Å | <(DHA)° |
|----------------------------|-----------|------------|------------|---------|
| O(1)-H(1)...O(14)#1        | 0.810(10) | 2.62(2)    | 3.032(2)   | 113(2)  |
| O(1)-H(1)...O(15)#1        | 0.810(10) | 1.834(14)  | 2.608(2)   | 159(3)  |
| O(1W)-<br>H(1WA)...O(14)#2 | 0.825(10) | 1.859(13)  | 2.663(2)   | 165(3)  |
| O(1W)-H(1WB)...O(3W)       | 0.821(10) | 1.966(15)  | 2.741(3)   | 157(2)  |
| O(2W)-<br>H(2WA)...O(18)#3 | 0.817(10) | 2.293(18)  | 3.071(3)   | 159(4)  |
| O(2W)-H(2WB)...O(15)#1     | 0.819(10) | 2.05(2)    | 2.737(3)   | 141(3)  |
| O(3W)-H(3WA)...O(5)#6      | 0.821(10) | 2.38(4)    | 2.996(3)   | 132(4)  |
| C(3)-H(3)...O(7)#4         | 0.93      | 2.43       | 3.290(3)   | 154.0   |
| C(10)-H(10)...O(12)#5      | 0.93      | 2.46       | 3.341(3)   | 157.1   |
| C(14)-H(14)...O(14)#4      | 0.93      | 2.44       | 3.359(3)   | 168.0   |
| C(17)-H(17)...O(9)#5       | 0.93      | 2.49       | 3.415(3)   | 172.5   |
| C(21)-H(21)...O(17)#4      | 0.93      | 2.55       | 3.456(3)   | 166.3   |

Symmetry transformations used to generate equivalent atoms: #1 -x+1,-y+2,-z+1; #2 -x,-y+2,-z+1; #3 x,y,z+1; #6 -x,-y+1,-z+1

**Table S5** Bond lengths [ $\text{\AA}$ ] and angles [deg] for **3**.

|                    |            |                    |            |
|--------------------|------------|--------------------|------------|
| Cu(1)-O(3)         | 1.928(2)   | Cu(2)-O(2)         | 1.938(2)   |
| Cu(1)-O(1)         | 1.9531(19) | Cu(2)-O(4)         | 1.944(2)   |
| Cu(1)-O(1W)        | 1.961(2)   | Cu(2)-O(2)#2       | 1.950(2)   |
| Cu(1)-O(1)#1       | 1.9649(19) | Cu(2)-O(1)         | 1.971(2)   |
| Cu(1)-O(2W)        | 2.368(3)   | Cu(2)-O(2W)        | 2.410(2)   |
| Cu(1)-Cu(1)#1      | 2.9534(8)  | Cu(2)-Cu(2)#2      | 2.9268(8)  |
| O(3)-Cu(1)-O(1)    | 98.64(8)   | O(2)-Cu(2)-O(4)    | 90.10(9)   |
| O(3)-Cu(1)-O(1W)   | 89.45(9)   | O(2)-Cu(2)-O(2)#2  | 82.33(9)   |
| O(1)-Cu(1)-O(1W)   | 170.42(9)  | O(4)-Cu(2)-O(2) #2 | 169.19(9)  |
| O(3)-Cu(1)-O(1)#1  | 171.68(9)  | O(2)-Cu(2)-O(1)    | 170.25(9)  |
| O(1)-Cu(1)-O(1)#1  | 82.16(8)   | O(4)-Cu(2)-O(1)    | 93.56(9)   |
| O(1W)-Cu(1)-O(1)#1 | 89.09(9)   | O(2)#2-Cu(2)-O(1)  | 92.75(8)   |
| O(3)-Cu(1)-O(2W)   | 90.50(9)   | O(2)-Cu(2)-O(2W)   | 108.73(10) |
| O(1)-Cu(1)-O(2W)   | 81.84(8)   | O(4)-Cu(2)-O(2W)   | 88.92(9)   |
| O(1W)-Cu(1)-O(2W)  | 103.34(9)  | O(2)#2-Cu(2)-O(2W) | 100.78(9)  |
| O(1)#1-Cu(1)-O(2W) | 97.81(8)   | O(1)-Cu(2)-O(2W)   | 80.40(8)   |

Symmetry transformations used to generate equivalent atoms: #1 -x,-y+1,-z; #2 -x,-y,-z

**Table S6** The hydrogen bonding data for **3**.

| D-H $\cdots$ A                | d(D-H)/ $\text{\AA}$ | d(H $\cdots$ A)/ $\text{\AA}$ | d(D $\cdots$ A)/ $\text{\AA}$ | $\angle(\text{DHA})/^\circ$ |
|-------------------------------|----------------------|-------------------------------|-------------------------------|-----------------------------|
| O(1W)-H(1WA) $\cdots$ O(2)#3  | 0.817(10)            | 1.92(2)                       | 2.651(3)                      | 149(4)                      |
| O(1W)-H(1WB) $\cdots$ O(5)#4  | 0.819(10)            | 2.25(3)                       | 2.871(3)                      | 133(3)                      |
| O(2W)-H(2WA) $\cdots$ O(1W)#5 | 0.816(10)            | 2.39(3)                       | 3.050(3)                      | 139(3)                      |
| O(1)-H(1) $\cdots$ O(7)#6     | 0.801(18)            | 1.82(2)                       | 2.614(3)                      | 168(4)                      |
| O(2)-H(2) $\cdots$ O(8)#7     | 0.806(19)            | 2.13(3)                       | 2.878(3)                      | 154(4)                      |

symmetry transformations used to generate equivalent atoms: #3 x,y+1,z; #4 -x+1,-y+2,-z+1; #5 -x+1,-y+1,-z; #6 -x,-y+1,-z+1; #7 -x,-y,-z+1

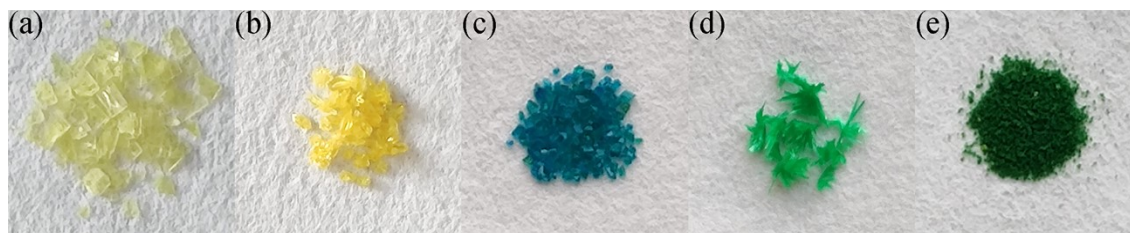

**Fig. S1** The photographs of HDNB-Cl (a), HDNB-OH (b) and crystals for **1** (c), **2** (d) and **3** (e).

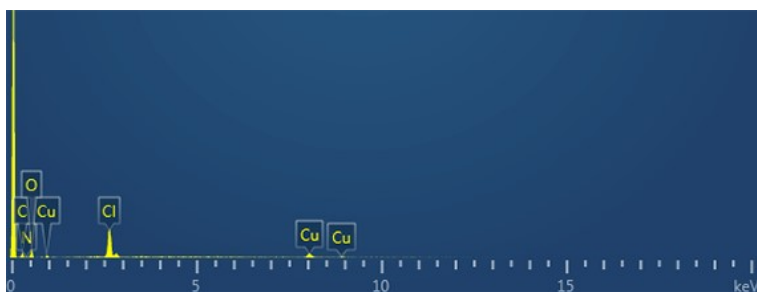

**Fig. S2** EDS of **1** shows Cl in the structure.

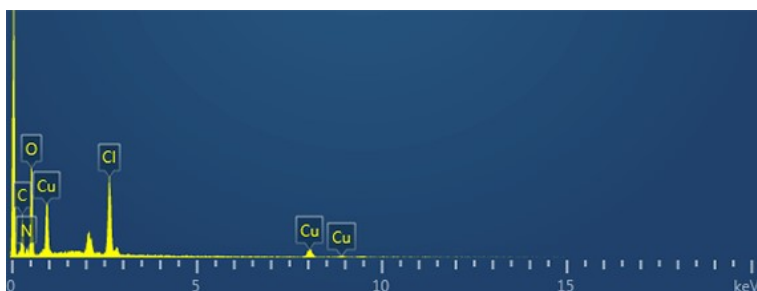

**Fig. S3** EDS of **2** shows Cl in the structure.

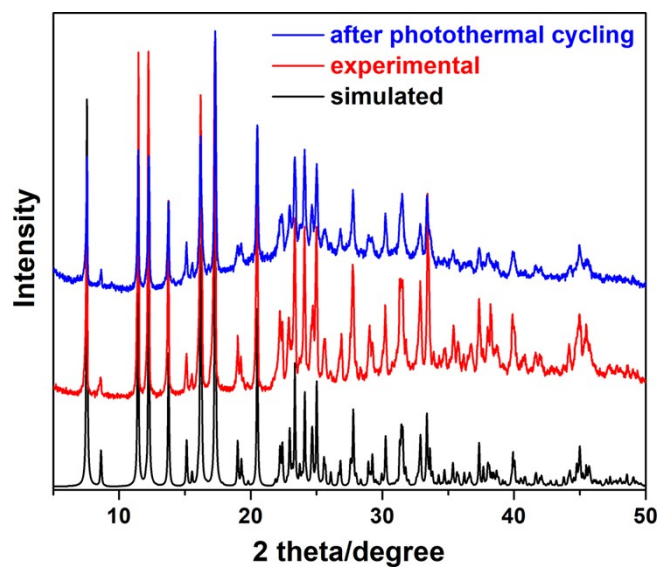

**Fig. S4** PXRD patterns of **1**.

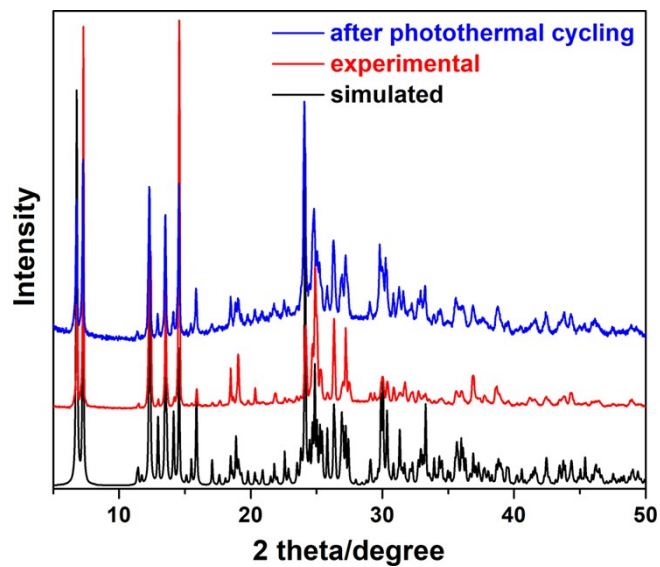

Fig. S5 PXR D patterns of 2.

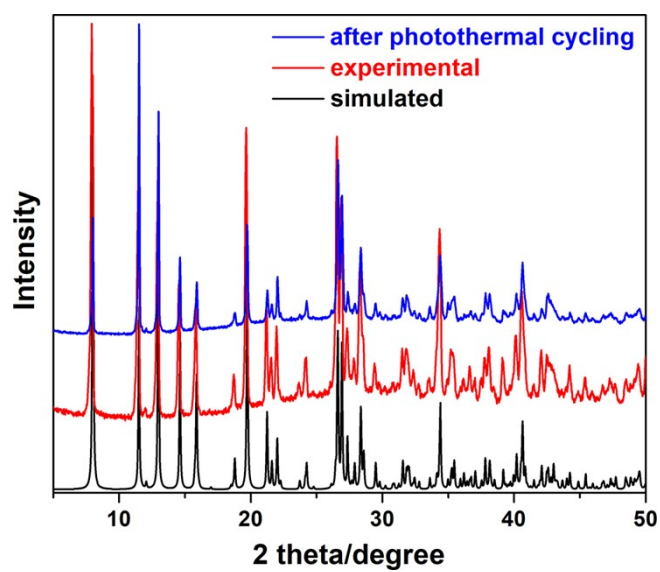

Fig. S6 PXR D patterns of 3.

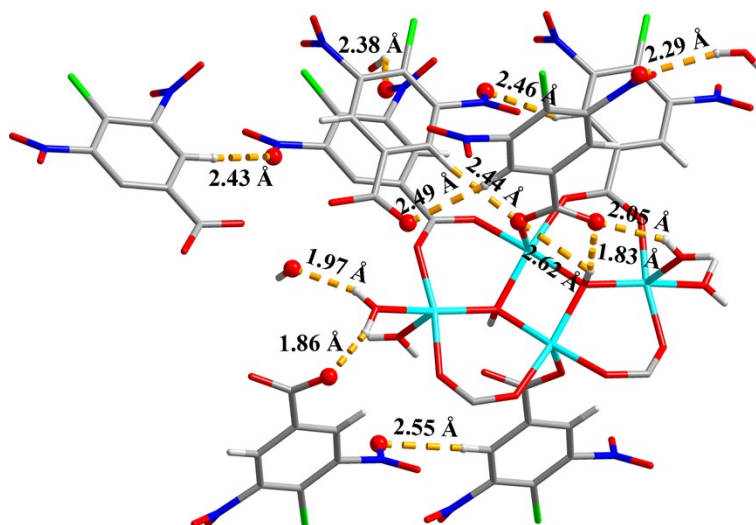

**Fig. S7** The hydrogen bonding interactions in **2**. H $\cdots$ O distances are marked.

There are two types of hydrogen bonds in **2**, which are O-H $\cdots$ O hydrogen bonds [O (terminal water molecule)-H $\cdots$ O (carboxylate oxygen) hydrogen bonds (H $\cdots$ O separations: 1.86 and 2.05 Å), O (terminal water molecule)-H $\cdots$ O (nitro group) hydrogen bonds (H $\cdots$ O separations: 2.29 Å), O (terminal water molecule)-H $\cdots$ O (free water molecule) hydrogen bonds (H $\cdots$ O separations: 1.97 Å), O ( $\mu_3$ -OH anion)-H $\cdots$ O (carboxylate oxygen) hydrogen bonds (H $\cdots$ O separations: 1.83 and 2.62 Å), and O (free water molecule)-H $\cdots$ O (nitro group) hydrogen bonds (H $\cdots$ O separations: 2.38 Å)]; the extensive C-H $\cdots$ O hydrogen bonds [C (benzene ring)-H $\cdots$ O (carboxylate oxygen) hydrogen bonds (H $\cdots$ O separations: 2.44 and 2.49 Å), C (benzene ring)-H $\cdots$ O (nitro group) hydrogen bonds (H $\cdots$ O separations: 2.43, 2.46 and 2.55 Å)].

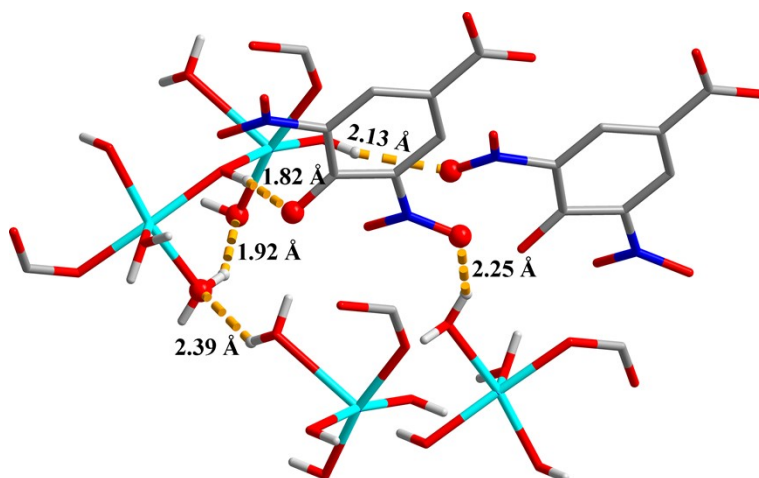

**Fig. S8** The hydrogen bonding interactions in **3**. H $\cdots$ O distances are marked.

There are abundant O-H $\cdots$ O hydrogen bonds in compound **3**, that are [O (terminal water molecule)-H $\cdots$ O ( $\mu_2$ -OH anion) hydrogen bonds (H $\cdots$ O separations: 1.92 Å), O (terminal water molecule)-H $\cdots$ O (nitro group) hydrogen bonds (H $\cdots$ O separations: 2.25 Å), O (bridging water molecule)-H $\cdots$ O (terminal water molecule) hydrogen bonds (H $\cdots$ O separations: 2.39 Å), O ( $\mu_3$ -OH anion)-H $\cdots$ O (phenolic hydroxyl group) hydrogen bonds (H $\cdots$ O separations: 1.82 Å), and O ( $\mu_2$ -OH anion)-H $\cdots$ O (nitro group) hydrogen bonds (H $\cdots$ O separations: 2.13 Å)] (Fig. S8).

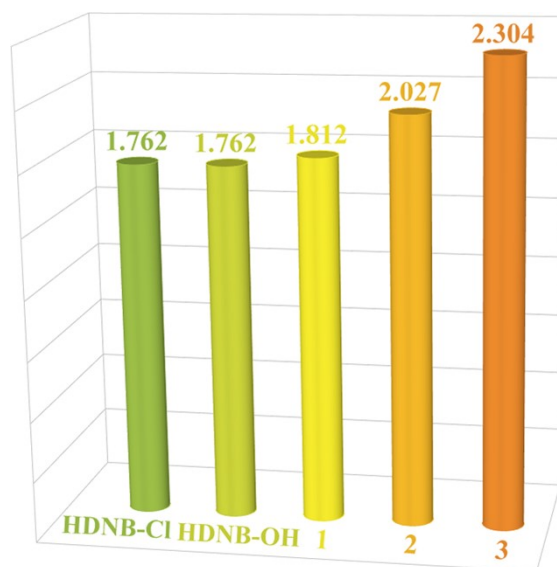

**Fig. S9** Density comparison of ligands and compounds **1-3**.

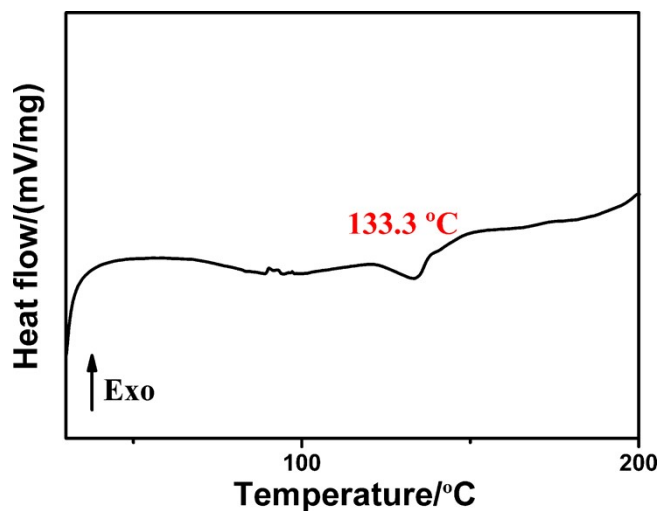

Fig. S10 A zoom in view of the endothermic peak in 1.

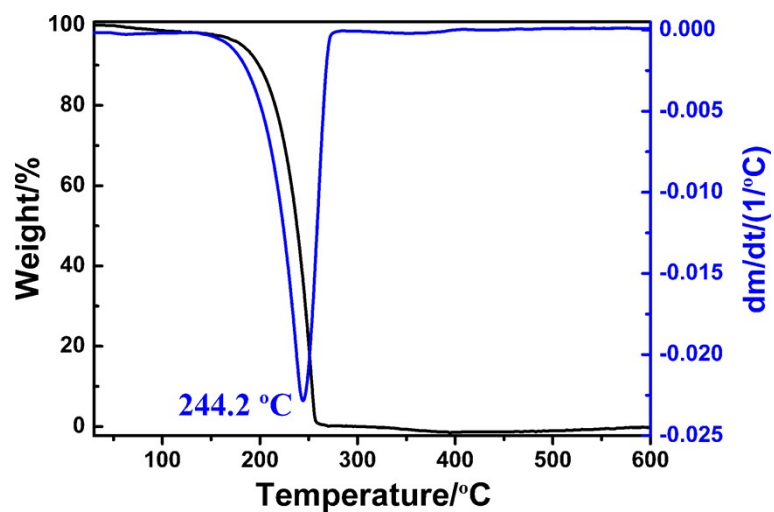

Fig. S11 TG and DTG curves of HDNB-Cl.

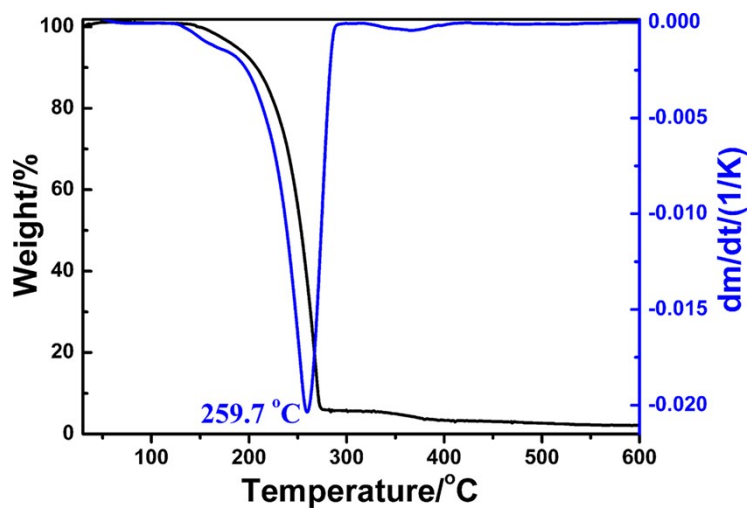

Fig. S12 TG and DTG curves of HDNB-OH.



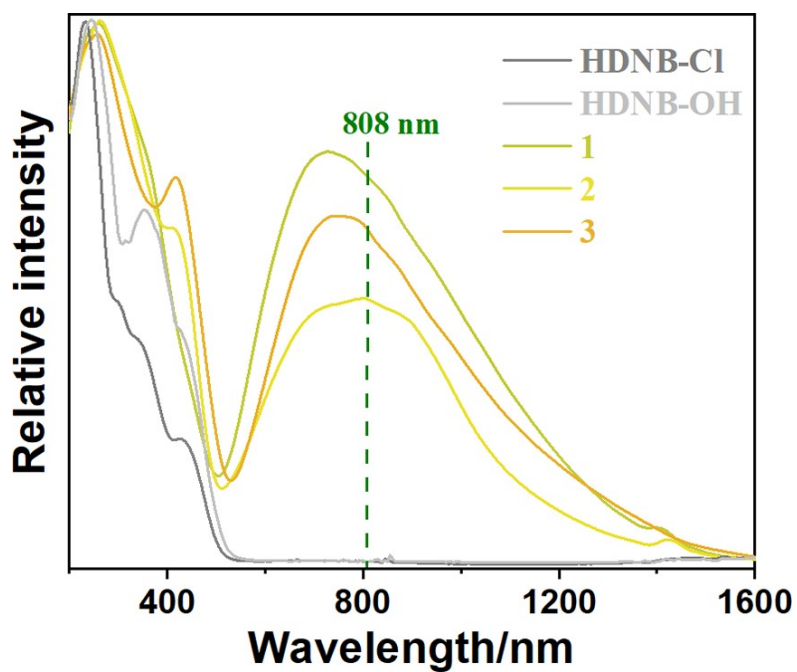

Fig. S13 Solid state UV-vis spectra of ligands and compounds 1-3.

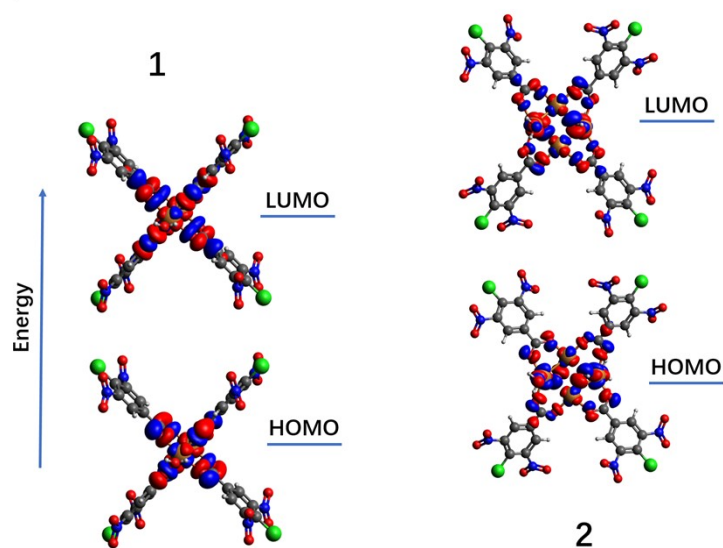

Fig. S14 The energies and compositions of HOMO and LUMO of 1 and 2.

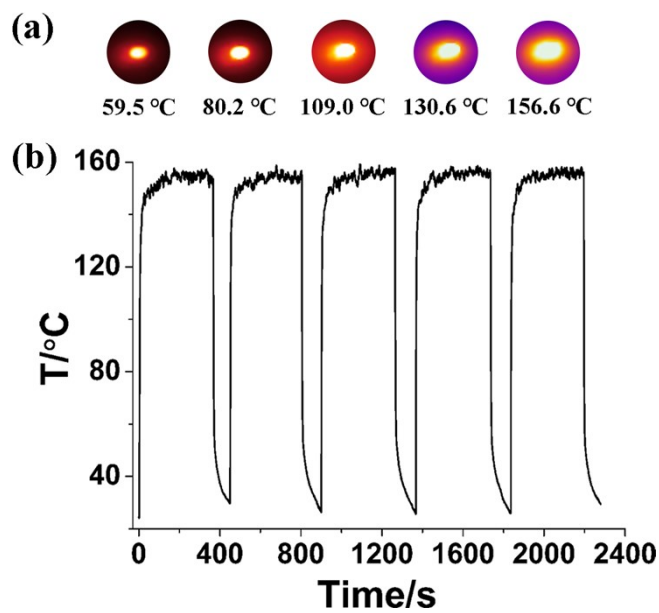

**Fig. S15** (a) IR thermal images of **1** under different NIR laser intensities (0.3, 0.5, 0.75, 1.0 and 1.25  $\text{W}\cdot\text{cm}^{-2}$ ). (b) Photothermal cycling curve of **1** performed at 1.25  $\text{W}\cdot\text{cm}^{-2}$  laser intensity.

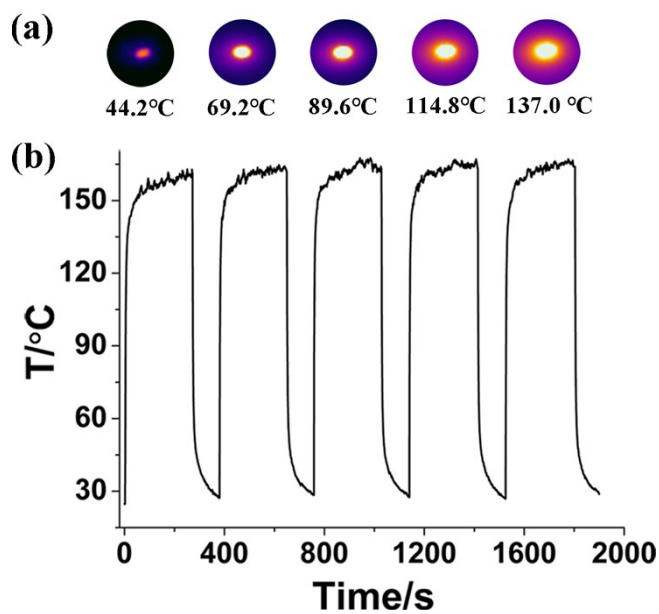

**Fig. S16** (a) IR thermal images of **2** under different NIR laser intensities (0.3, 0.5, 0.75, 1.0 and 1.25  $\text{W}\cdot\text{cm}^{-2}$ ). (b) Photothermal cycling curve of **2** performed under 1.5  $\text{W}\cdot\text{cm}^{-2}$  laser intensity.

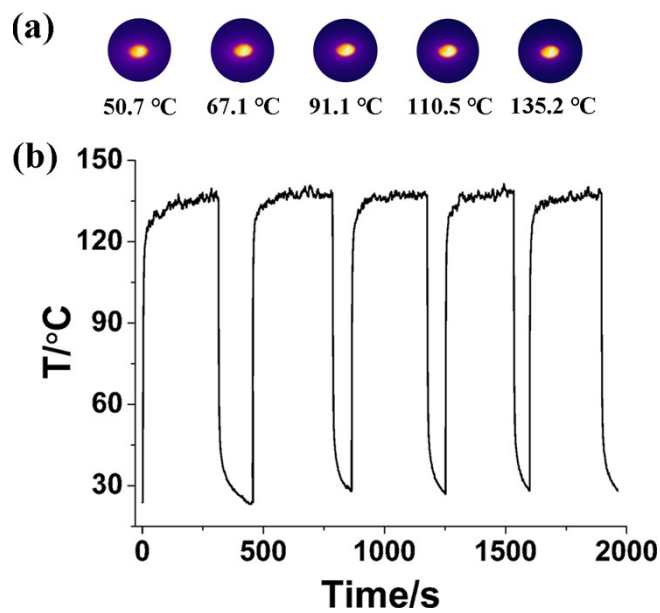

**Fig. S17** (a) IR thermal images of **3** under different NIR laser intensities (0.3, 0.5, 0.75, 1.0 and 1.25  $\text{W}\cdot\text{cm}^{-2}$ ). (b) Photothermal cycling curve of **3** at 1.25  $\text{W}\cdot\text{cm}^{-2}$  laser intensity.

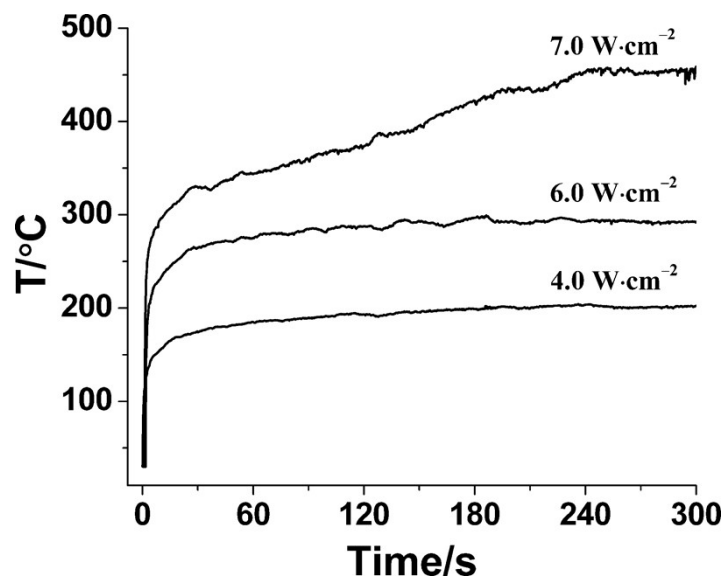

**Fig. S18** Photothermal conversion curves of **3** at different NIR laser intensities from 4 to 7  $\text{W}\cdot\text{cm}^{-2}$ .

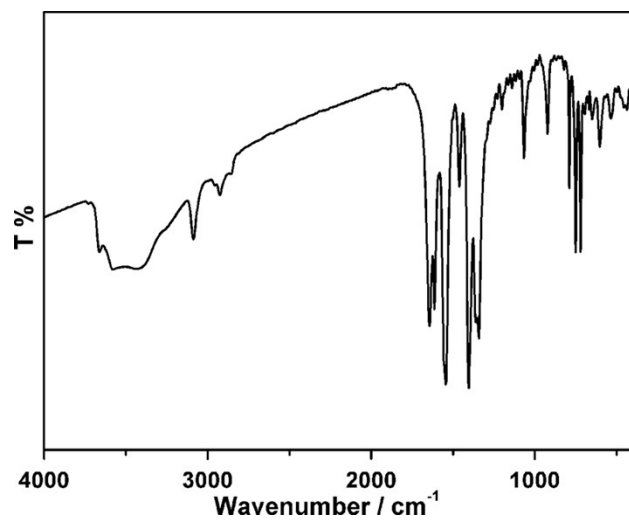

**Fig. S19** IR spectrum of compound 1.

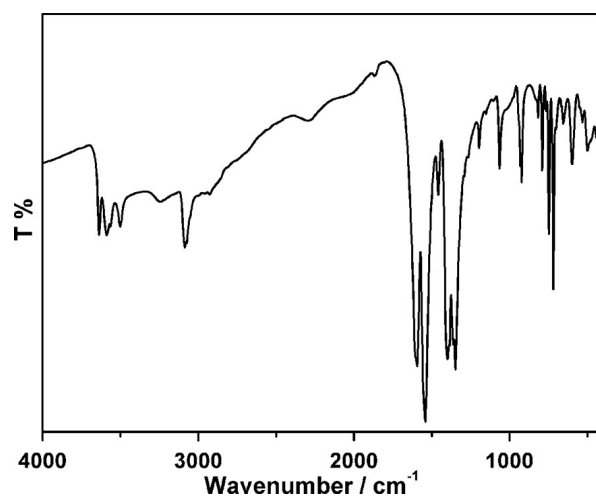

**Fig. S20** IR spectrum of compound 2.

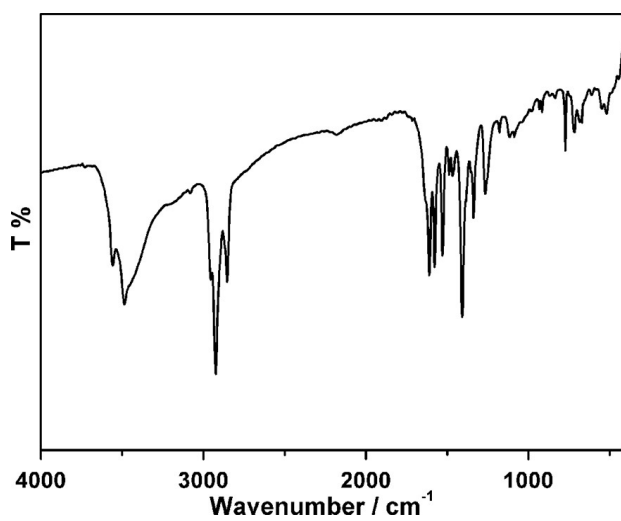

**Fig. S21** IR spectrum of compound 3.
